# Supplementary material
Source: ML conference proceedings conference paper supplement (https://proceedings.mlr.press/v97/uurtio19a.html)
Supplement: Supplementary file [file uurtio19a-supp.pdf]

---

# Supplementary Material: Large-Scale Sparse Kernel Canonical Correlation Analysis

---

Viivi Uurtio<sup>1,2</sup> Sahely Bhadra<sup>3</sup> Juho Rousu<sup>1,2</sup>

## 1. The Gradients with Respect to $\mathbf{u}$

The objective function, when applying the polynomial kernel, is

$$\rho_{\text{poly}} = \frac{((\mathbf{X} \cdot \mathbf{u} + \mathbf{r}_x)^{d_x})^\top \cdot \mathbf{k}}{\|(\mathbf{X} \cdot \mathbf{u} + \mathbf{r}_x)^{d_x}\| \cdot \|\mathbf{k}\|} \quad (1)$$

where  $\mathbf{k}$  denotes the polynomial kernel on  $\mathbf{Y}\mathbf{v}$ . The gradient of the objective function, with respect to  $\mathbf{u}$ :

$$\begin{aligned} \frac{\partial \rho_{\text{poly}}}{\partial \mathbf{u}} &= d_x \cdot (((\mathbf{r}_x + \mathbf{X} \cdot \mathbf{u})^{d_x})^\top \cdot (\mathbf{r}_x + \mathbf{X} \cdot \mathbf{u})^{d_x})^{-\frac{1}{2}} \\ &\quad \cdot (\mathbf{k}^\top \cdot \mathbf{k})^{-\frac{1}{2}} \cdot (\mathbf{k} \odot (\mathbf{r}_x + \mathbf{X} \cdot \mathbf{u})^{(d_x-1)})^\top \\ &\quad \cdot \mathbf{X} - ((d_x \cdot (((\mathbf{r}_x + \mathbf{X} \cdot \mathbf{u})^{d_x})^\top \\ &\quad \cdot (\mathbf{r}_x + \mathbf{X} \cdot \mathbf{u})^{d_x})^{-\frac{3}{2}} \cdot (\mathbf{k}^\top \cdot \mathbf{k})^{-\frac{1}{2}})/2 \\ &\quad \cdot \mathbf{k}^\top \cdot (\mathbf{r}_x + \mathbf{X} \cdot \mathbf{u})^{d_x} \cdot ((\mathbf{r}_x + \mathbf{X} \cdot \mathbf{u})^{d_x} \\ &\quad \odot (\mathbf{r}_x + \mathbf{X} \cdot \mathbf{u})^{(d_x-1)})^\top \cdot \mathbf{X} \\ &\quad + (d_x \cdot (((\mathbf{r}_x + \mathbf{X} \cdot \mathbf{u})^{d_x})^\top \\ &\quad \cdot (\mathbf{r}_x + \mathbf{X} \cdot \mathbf{u})^{d_x})^{-\frac{3}{2}} \cdot (\mathbf{k}^\top \cdot \mathbf{k})^{-\frac{1}{2}})/2 \\ &\quad \cdot ((\mathbf{r}_x + \mathbf{X} \cdot \mathbf{u})^{d_x})^\top \cdot \mathbf{k} \cdot ((\mathbf{r}_x + \mathbf{X} \cdot \mathbf{u})^{d_x} \\ &\quad \odot (\mathbf{r}_x + \mathbf{X} \cdot \mathbf{u})^{(d_x-1)})^\top \cdot \mathbf{X}). \end{aligned}$$

The gradient with respect to  $\mathbf{v}$  is obtained similarly. The dominating computational cost arises from the matrix-vector product  $\mathbf{X} \cdot \mathbf{u}$  which lead to  $O((p+q)n)$  time-complexity per update where  $\mathbf{X} \in \mathbb{R}^{n \times p}$ .

The objective function, when applying the Gaussian (RBF) kernel, is

$$\rho_{\text{RBF}} = \frac{\exp(-\frac{\mathbf{x}}{2 \cdot \sigma^2} + \frac{\mathbf{X} \cdot \mathbf{u}}{2 \cdot \sigma^2} - \frac{\|\mathbf{u}\|_2^2}{2 \cdot \sigma^2} \cdot \mathbf{1})^\top \cdot \mathbf{k}}{\|\exp(-\frac{\mathbf{x}}{2 \cdot \sigma^2} + \frac{\mathbf{X} \cdot \mathbf{u}}{2 \cdot \sigma^2} - \frac{\|\mathbf{u}\|_2^2}{2 \cdot \sigma^2} \cdot \mathbf{1})\| \cdot \|\mathbf{k}\|} \quad (2)$$

where  $\mathbf{x}$  is the vector of norms of examples of  $\mathbf{X}$  and  $\mathbf{k}$  denotes the Gaussian kernel on  $\mathbf{Y}\mathbf{v}$ . The gradient of the

---

\*Equal contribution <sup>1</sup>Department of Computer Science, Aalto University, Espoo, Finland <sup>2</sup>Helsinki Institute for Information Technology, Helsinki, Finland <sup>3</sup>Computer Science and Engineering, Indian Institute of Technology Palakkad, Palakkad, India. Correspondence to: Viivi Uurtio <viivi.uurtio@aalto.fi>.

objective function, with respect to  $\mathbf{u}$ :

$$\begin{aligned} \frac{\partial \rho_{\text{RBF}}}{\partial \mathbf{u}} &= ((\exp(1/(2 \cdot \sigma^2) \cdot \mathbf{X} \cdot \mathbf{u} - 1/(2 \cdot \sigma^2)) \\ &\quad \cdot \mathbf{x} - \|\mathbf{u}\|_2^2/(2 \cdot \sigma^2) \cdot \mathbf{1})^\top \\ &\quad \cdot \exp(1/(2 \cdot \sigma^2) \cdot \mathbf{X} \cdot \mathbf{u} - 1/(2 \cdot \sigma^2)) \\ &\quad \cdot \mathbf{x} - \|\mathbf{u}\|_2^2/(2 \cdot \sigma^2) \cdot \mathbf{1})^{-(1+1/2)} \cdot \\ &\quad (\mathbf{k}^\top \cdot \mathbf{k})^{(-1/2)}/(2 \cdot \sigma^2) \cdot \text{sum}(\exp(1/(2 \cdot \sigma^2) \\ &\quad \cdot \mathbf{X} \cdot \mathbf{u} - 1/(2 \cdot \sigma^2) \cdot \mathbf{x} - \|\mathbf{u}\|_2^2/(2 \cdot \sigma^2) \cdot \mathbf{1}) \odot \\ &\quad \exp(1/(2 \cdot \sigma^2) \cdot \mathbf{X} \cdot \mathbf{u} - 1/(2 \cdot \sigma^2)) \\ &\quad \cdot \mathbf{x} - \|\mathbf{u}\|_2^2/(2 \cdot \sigma^2) \cdot \mathbf{1}) \cdot \exp(1/(2 \cdot \sigma^2) \cdot \mathbf{X} \cdot \mathbf{u} \\ &\quad - 1/(2 \cdot \sigma^2) \cdot \mathbf{x} - \|\mathbf{u}\|_2^2/(2 \cdot \sigma^2) \cdot \mathbf{1})^\top \\ &\quad \cdot \mathbf{k} \cdot \mathbf{u} - ((\exp(1/(2 \cdot \sigma^2) \cdot \mathbf{X} \cdot \mathbf{u} - 1/(2 \cdot \sigma^2)) \\ &\quad \cdot \mathbf{x} - \|\mathbf{u}\|_2^2/(2 \cdot \sigma^2) \cdot \mathbf{1})^\top \cdot \exp(1/(2 \cdot \sigma^2) \cdot \mathbf{X} \cdot \mathbf{u} \\ &\quad - 1/(2 \cdot \sigma^2) \cdot \mathbf{x} - \|\mathbf{u}\|_2^2/(2 \cdot \sigma^2) \cdot \mathbf{1}))^{-(1+1/2)} \\ &\quad \cdot (\mathbf{k}^\top \cdot \mathbf{k})^{(-1/2)})/(4 \cdot \sigma^2) \cdot \exp(1/(2 \cdot \sigma^2) \cdot \mathbf{X} \cdot \\ &\quad \mathbf{u} - 1/(2 \cdot \sigma^2) \cdot \mathbf{x} - \|\mathbf{u}\|_2^2/(2 \cdot \sigma^2) \cdot \mathbf{1})^\top \\ &\quad \cdot \mathbf{k} \cdot \mathbf{X}^\top \cdot (\exp(1/(2 \cdot \sigma^2) \cdot \mathbf{X} \cdot \mathbf{u} - 1/(2 \cdot \sigma^2) \cdot \mathbf{x} - \\ &\quad \|\mathbf{u}\|_2^2/(2 \cdot \sigma^2) \cdot \mathbf{1}) \odot \exp(1/(2 \cdot \sigma^2) \cdot \mathbf{X} \cdot \\ &\quad \mathbf{u} - 1/(2 \cdot \sigma^2) \cdot \mathbf{x} - \|\mathbf{u}\|_2^2/(2 \cdot \sigma^2) \cdot \mathbf{1})) \\ &\quad - ((\exp(1/(2 \cdot \sigma^2) \cdot \mathbf{X} \cdot \mathbf{u} - 1/(2 \cdot \sigma^2)) \\ &\quad \cdot \mathbf{x} - \|\mathbf{u}\|_2^2/(2 \cdot \sigma^2) \cdot \mathbf{1})^\top \cdot \exp(1/(2 \cdot \sigma^2) \cdot \mathbf{X} \cdot \mathbf{u} \\ &\quad - 1/(2 \cdot \sigma^2) \cdot \mathbf{x} - \|\mathbf{u}\|_2^2/(2 \cdot \sigma^2) \cdot \mathbf{1}))^{-(1+1/2)} \\ &\quad \cdot (\mathbf{k}^\top \cdot \mathbf{k})^{(-1/2)})/(4 \cdot \sigma^2) \cdot \mathbf{k}^\top \cdot \exp(1/(2 \cdot \sigma^2) \\ &\quad \cdot \mathbf{X} \cdot \mathbf{u} - 1/(2 \cdot \sigma^2) \cdot \mathbf{x} - \|\mathbf{u}\|_2^2/(2 \cdot \sigma^2) \cdot \mathbf{1}) \cdot \mathbf{X}^\top \cdot \\ &\quad (\exp(1/(2 \cdot \sigma^2) \cdot \mathbf{X} \cdot \mathbf{u} - 1/(2 \cdot \sigma^2) \cdot \mathbf{x} - \\ &\quad \|\mathbf{u}\|_2^2/(2 \cdot \sigma^2) \cdot \mathbf{1}) \odot \exp(1/(2 \cdot \sigma^2) \cdot \mathbf{X} \cdot \mathbf{u} - 1/(2 \cdot \sigma^2) \cdot \mathbf{x} \\ &\quad - \|\mathbf{u}\|_2^2/(2 \cdot \sigma^2) \cdot \mathbf{1})) + ((\exp(1/(2 \cdot \sigma^2) \cdot \mathbf{X} \cdot \mathbf{u} - 1/(2 \cdot \sigma^2) \cdot \mathbf{x} \\ &\quad - \|\mathbf{u}\|_2^2/(2 \cdot \sigma^2) \cdot \mathbf{1})^\top \cdot \exp(1/(2 \cdot \sigma^2) \cdot \mathbf{X} \cdot \mathbf{u} \\ &\quad - 1/(2 \cdot \sigma^2) \cdot \mathbf{x} - \|\mathbf{u}\|_2^2/(2 \cdot \sigma^2) \cdot \mathbf{1}))^{-(1+1/2)} \cdot \\ &\quad (\mathbf{k}^\top \cdot \mathbf{k})^{(-1/2)}/(2 \cdot \sigma^2) \cdot \text{sum}(\exp(1/(2 \cdot \sigma^2) \cdot \\ &\quad \mathbf{X} \cdot \mathbf{u} - 1/(2 \cdot \sigma^2) \cdot \mathbf{x} - \|\mathbf{u}\|_2^2/(2 \cdot \sigma^2) \cdot \mathbf{1}) \odot \\ &\quad \exp(1/(2 \cdot \sigma^2) \cdot \mathbf{X} \cdot \mathbf{u} - 1/(2 \cdot \sigma^2) \cdot \mathbf{x} \\ &\quad - \|\mathbf{u}\|_2^2/(2 \cdot \sigma^2) \cdot \mathbf{1})) \cdot \mathbf{k}^\top \cdot \exp(1/(2 \cdot \sigma^2) \\ &\quad \cdot \mathbf{X} \cdot \mathbf{u} - 1/(2 \cdot \sigma^2) \cdot \mathbf{x} - \|\mathbf{u}\|_2^2/(2 \cdot \sigma^2) \cdot \mathbf{1}) \cdot \\ &\quad \mathbf{u} + ((\exp(1/(2 \cdot \sigma^2) \cdot \mathbf{X} \cdot \mathbf{u} - 1/(2 \cdot \sigma^2) \cdot \mathbf{x} - \\ &\quad \|\mathbf{u}\|_2^2/(2 \cdot \sigma^2) \cdot \mathbf{1})^\top \cdot \exp(1/(2 \cdot \sigma^2) \cdot \mathbf{X} \cdot \mathbf{x} - \\ &\quad 1/(2 \cdot \sigma^2) \cdot \mathbf{u} - \|\mathbf{u}\|_2^2/(2 \cdot \sigma^2) \cdot \mathbf{1}))^{(-1/2)} \cdot \\ &\quad (\mathbf{k}^\top \cdot \mathbf{k})^{(-1/2)})/(2 \cdot \sigma^2) \cdot \mathbf{X}^\top \cdot (\mathbf{k} \odot \exp(1/(2 \cdot \sigma^2) \\ &\quad \cdot \mathbf{X} \cdot \mathbf{u} - 1/(2 \cdot \sigma^2) \cdot \mathbf{x} - \|\mathbf{u}\|_2^2/(2 \cdot \sigma^2) \cdot \mathbf{1})) \\ &\quad - ((\exp(1/(2 \cdot \sigma^2) \cdot \mathbf{X} \cdot \mathbf{u} - 1/(2 \cdot \sigma^2) \cdot \mathbf{x} \\ &\quad - \|\mathbf{u}\|_2^2/(2 \cdot \sigma^2) \cdot \mathbf{1})^\top \cdot \exp(1/(2 \cdot \sigma^2) \\ &\quad \cdot \mathbf{X} \cdot \mathbf{u} - 1/(2 \cdot \sigma^2) \cdot \mathbf{x} - \|\mathbf{u}\|_2^2/(2 \cdot \sigma^2) \cdot \mathbf{1}))^{(-1/2)} \\ &\quad \cdot (\mathbf{k}^\top \cdot \mathbf{k})^{(-1/2)})/\sigma^2 \cdot \text{sum}(\mathbf{k} \odot \exp(1/(2 \cdot \sigma^2) \cdot \mathbf{X} \cdot \\ &\quad \mathbf{u} - 1/(2 \cdot \sigma^2) \cdot \mathbf{x} - \|\mathbf{u}\|_2^2/(2 \cdot \sigma^2) \cdot \mathbf{1})) \cdot \mathbf{u}. \end{aligned}$$

The gradient with respect to  $\mathbf{v}$  is obtained similarly. The dominating computational cost arises from the matrix-vector product  $\mathbf{X} \cdot \mathbf{u}$  which lead to  $O((p+q)n)$  time-complexity per update where  $\mathbf{X} \in \mathbb{R}^{n \times p}$ .

## 2. Proof of Theorems 4.3

In general cases, pre-image  $\mathbf{x}$  for is chosen such that the squared distance of  $\mathbf{w}_x$  and  $\phi_x(\mathbf{u})$  is minimized.

$$\begin{aligned}\tilde{\mathbf{u}}(\mathbf{w}_x) &= \arg \min_{\mathbf{u} \in \mathbb{R}^p} \|\mathbf{w}_x - \phi_x(\mathbf{u})\|_2 \\ \tilde{\mathbf{v}}(\mathbf{w}_y) &= \arg \min_{\mathbf{v} \in \mathbb{R}^q} \|\mathbf{w}_y - \phi_y(\mathbf{v})\|_2\end{aligned}\quad (3)$$

And hence the bounds on pre-image errors are then defined as

$$\begin{aligned}B_{\mathbf{X}} &= \max_{\mathbf{w}_x \in \mathcal{L}(\phi_x, \mathbf{X})} \|\mathbf{w}_x - \phi_x(\tilde{\mathbf{u}}(\mathbf{w}_x))\|_2 \\ B_{\mathbf{Y}} &= \max_{\mathbf{w}_y \in \mathcal{L}(\phi_y, \mathbf{Y})} \|\mathbf{w}_y - \phi_y(\tilde{\mathbf{v}}(\mathbf{w}_y))\|_2.\end{aligned}\quad (4)$$

**Theorem 2.1.** *Let us assume that norm in  $\mathcal{H}_x$  and  $\mathcal{H}_y$  are upper bounded by  $M_x$  and  $M_y$ , i.e.,*

$$\begin{aligned}\forall \phi_x(\mathbf{u}) \in \mathcal{H}_x, \|\phi_x(\mathbf{u})\| &\leq M_x \\ \text{and } \forall \phi_y(\mathbf{v}) \in \mathcal{H}_y, \|\phi_y(\mathbf{v})\| &\leq M_y.\end{aligned}\quad (5)$$

Then,

$$\rho_{\text{gradKCCA}} \geq \rho_{\text{preimage}} \geq \rho_{\text{kcca}} - \left( \frac{B_y}{M_y} + \frac{B_x}{M_x} \right)$$

*Proof.* Form bound of norm in Hilbert spaces:

$$\begin{aligned}\forall (\mathbf{u} \text{ and } \mathbf{x}_i), \\ -M_x^2 \leq \langle \phi_x(\mathbf{u}), \phi_x(\mathbf{x}_i) \rangle = k^x(\mathbf{x}_i, \mathbf{u}) \leq M_x^2 \\ \text{and } \forall (\mathbf{v} \text{ and } \mathbf{y}_i), \\ -M_y^2 \leq \langle \phi_y(\mathbf{v}), \phi_y(\mathbf{y}_i) \rangle = k^y(\mathbf{y}_i, \mathbf{v}) \leq M_y^2.\end{aligned}\quad (6)$$

As  $\rho_{\text{kcca}} \geq 0$ , the correlation achieved by pre-images is also positive. For positive  $\rho_{\text{preimage}}$  :

$$\begin{aligned}\rho_{\text{preimage}} &= \frac{\mathbf{k}^x(\tilde{\mathbf{u}}(\mathbf{w}_x))^T \mathbf{k}^y(\tilde{\mathbf{v}}(\mathbf{w}_y))}{\|\mathbf{k}^x(\tilde{\mathbf{u}}(\mathbf{w}_x))\| \|\mathbf{k}^y(\tilde{\mathbf{v}}(\mathbf{w}_y))\|} \\ &= \frac{\mathbf{k}^x(\tilde{\mathbf{u}}(\mathbf{w}_x))^T \mathbf{k}^y(\tilde{\mathbf{v}}(\mathbf{w}_y))}{\sqrt{\sum_i k^x(\mathbf{x}_i, \tilde{\mathbf{u}}(\mathbf{w}_x))^2} \sqrt{\sum_i k^y(\mathbf{y}_i, \tilde{\mathbf{v}}(\mathbf{w}_y))^2}} \\ &\geq \frac{\mathbf{k}^x(\tilde{\mathbf{u}}(\mathbf{w}_x))^T \mathbf{k}^y(\tilde{\mathbf{v}}(\mathbf{w}_y))}{nM_x^2 M_y^2}\end{aligned}\quad (7)$$

Note that, there always exist a pair of solution  $\alpha^*$  and  $\beta^*$  which gives optimal solution for KCCA and also satisfies

$\|\mathbf{K}^x \alpha^*\| = \sqrt{n}M_x^2$  and  $\|\mathbf{K}^y \beta^*\| = \sqrt{n}M_y^2$  (simple scaling of optimal solution). Given such solution  $\alpha^*$  and  $\beta^*$  for KCCA, the corresponding pre-image solution  $\tilde{\mathbf{u}}(\mathbf{w}_x^*)$  and  $\tilde{\mathbf{v}}(\mathbf{w}_y^*)$  is obtained by plugging the KCCA optimum  $\mathbf{w}_x^* = \sum_i \alpha_i^* \phi_x(\mathbf{x}_i)$  and  $\mathbf{w}_y^* = \sum_i \beta_i^* \phi_y(\mathbf{y}_i)$  into (3) (i.e. equation (8) and (9) in main manuscript ).

The difference between the correlation found by KCCA and by its pre-image  $\mathbf{u}(\tilde{\mathbf{w}}_x^*)$  and  $\mathbf{v}(\tilde{\mathbf{w}}_y^*)$  is

$$\begin{aligned}\rho_{\text{kcca}} - \rho_{\text{preimage}} &= \frac{\alpha^{*T} \mathbf{K}^x \mathbf{K}^y \beta^*}{\|\mathbf{K}^x \alpha^*\| \|\mathbf{K}^y \beta^*\|} - \frac{\mathbf{k}^x(\tilde{\mathbf{u}}(\mathbf{w}_x^*))^T \mathbf{k}^y(\tilde{\mathbf{v}}(\mathbf{w}_y^*))}{\|\mathbf{k}^x(\tilde{\mathbf{u}}(\mathbf{w}_x^*))\| \|\mathbf{k}^y(\tilde{\mathbf{v}}(\mathbf{w}_y^*))\|} \\ &\leq \frac{\alpha^{*T} \mathbf{K}^x \mathbf{K}^y \beta^*}{nM_x^2 M_y^2} - \frac{\mathbf{k}^x(\tilde{\mathbf{u}}(\mathbf{w}_x^*))^T \mathbf{k}^y(\tilde{\mathbf{v}}(\mathbf{w}_y^*))}{nM_x^2 M_y^2} \\ &\quad \text{[using (7) and the fact } \|\mathbf{K}^x \alpha^*\| = \sqrt{n}M_x^2 \\ &\quad \text{and } \|\mathbf{K}^y \beta^*\| = \sqrt{n}M_y^2] \\ &= \frac{\alpha^{*T} \mathbf{K}^x \mathbf{K}^y \beta^* - \alpha^{*T} \mathbf{K}^x \mathbf{k}^y(\tilde{\mathbf{v}}(\mathbf{w}_y^*))}{nM_x^2 M_y^2} \\ &\quad + \frac{\alpha^{*T} \mathbf{K}^x \mathbf{k}^y(\tilde{\mathbf{v}}(\mathbf{w}_y^*)) - \mathbf{k}^x(\tilde{\mathbf{u}}(\mathbf{w}_x^*))^T \mathbf{k}^y(\tilde{\mathbf{v}}(\mathbf{w}_y^*))}{nM_x^2 M_y^2} \\ &\quad \text{[by adding and subtracting same term]} \\ &= \left( \frac{\mathbf{K}^x \alpha^*}{nM_x^2 M_y^2} \right)^T \left( \mathbf{K}^y \beta^* - \mathbf{k}^y(\tilde{\mathbf{v}}(\mathbf{w}_y^*)) \right) \\ &\quad + \left( \mathbf{K}^x \alpha^* - \mathbf{k}^x(\tilde{\mathbf{u}}(\mathbf{w}_x^*)) \right)^T \frac{\mathbf{k}^y(\tilde{\mathbf{v}}(\mathbf{w}_y^*))}{nM_x^2 M_y^2}\end{aligned}\quad (8)$$

Where,

$$\begin{aligned}&\left( \mathbf{K}^x \alpha^* \right)^T \left( \mathbf{K}^y \beta^* - \mathbf{k}^y(\tilde{\mathbf{v}}(\mathbf{w}_y^*)) \right) \\ &\leq \|\mathbf{K}^x \alpha^*\| \|\mathbf{K}^y \beta^* - \mathbf{k}^y(\tilde{\mathbf{v}}(\mathbf{w}_y^*))\| \\ &= \sqrt{n}M_x^2 \sqrt{\sum_i \langle \phi_y(\mathbf{y}_i), (\mathbf{w}_y - \phi_y(\tilde{\mathbf{v}}(\mathbf{w}_y^*))) \rangle^2} \\ &\leq \sqrt{n}M_x^2 \sqrt{\sum_i \|\phi_y(\mathbf{y}_i)\|^2 \|\mathbf{w}_y - \phi_y(\tilde{\mathbf{v}}(\mathbf{w}_y^*))\|^2} \\ &\leq \sqrt{n}M_x^2 \sqrt{\sum_i M_y^2 B_y^2} \\ &= \sqrt{n}M_x^2 (\sqrt{n}M_y B_y) \\ &= nM_x^2 M_y B_y\end{aligned}\quad (9)$$

Again similarly,

$$\begin{aligned}&\left( \mathbf{K}^x \alpha^* - \mathbf{k}^x(\tilde{\mathbf{u}}(\mathbf{w}_x^*)) \right)^T \mathbf{k}^y(\tilde{\mathbf{v}}(\mathbf{w}_y^*)) \\ &\leq nM_x M_y^2 B_x\end{aligned}\quad (10)$$

Hence from (8) we get,

$$\begin{aligned}
 & \rho_{\text{kcca}} - \rho_{\text{preimage}} \\
 & \leq \frac{nM_x^2 M_y B_y}{nM_x^2 M_y^2} + \frac{nM_x M_y^2 B_x}{nM_x^2 M_y^2} \\
 & = \frac{B_y}{M_y} + \frac{B_x}{M_x} \tag{11}
 \end{aligned}$$

Hence using Lemma 4.2

$$\rho_{\text{gradKCCA}} \geq \rho_{\text{preimage}} \geq \rho_{\text{kcca}} - \left( \frac{B_y}{M_y} + \frac{B_x}{M_x} \right)$$

□
